# Supplementary material
Source: publisher figshare collection journal article supplement (https://acs.figshare.com/ndownloader/files/4024762)
Supplement: Supplementary file 1 [file 4024762]

## Supportive Information

### Mathematical Modeling and Experimental Breakthrough Curves of Carbon Dioxide Adsorption on Metal Organic Framework CPM-5

Rana Sabouni, Hossein Kazemian, Sohrab Rohani\*

*Department of Chemical and Biochemical Engineering, Western University, London, Ontario,  
Canada N6A5B9*

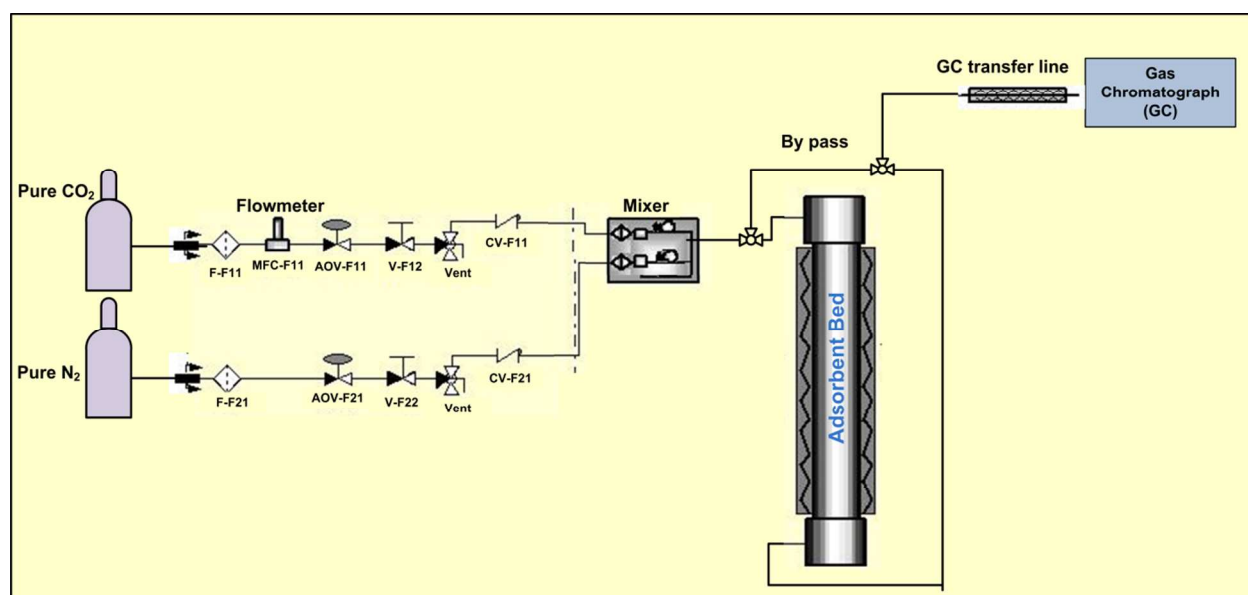

Figure S1

Figure S1: Simplified schematic diagram of the system used for adsorption experiments

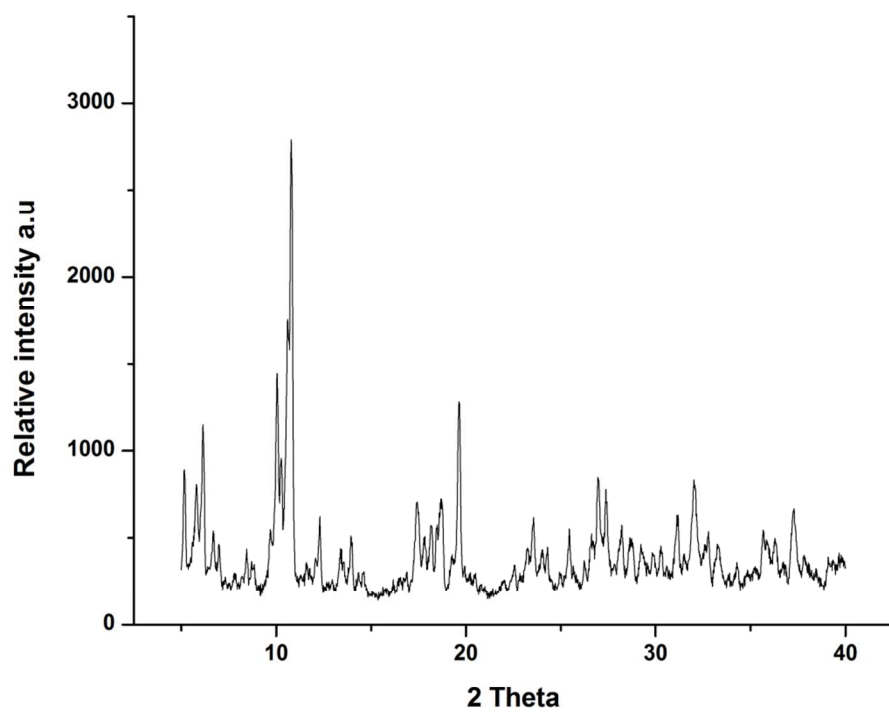

**Figure S2**

Figure S2: XRD pattern of the microwave-synthesized CPM-5

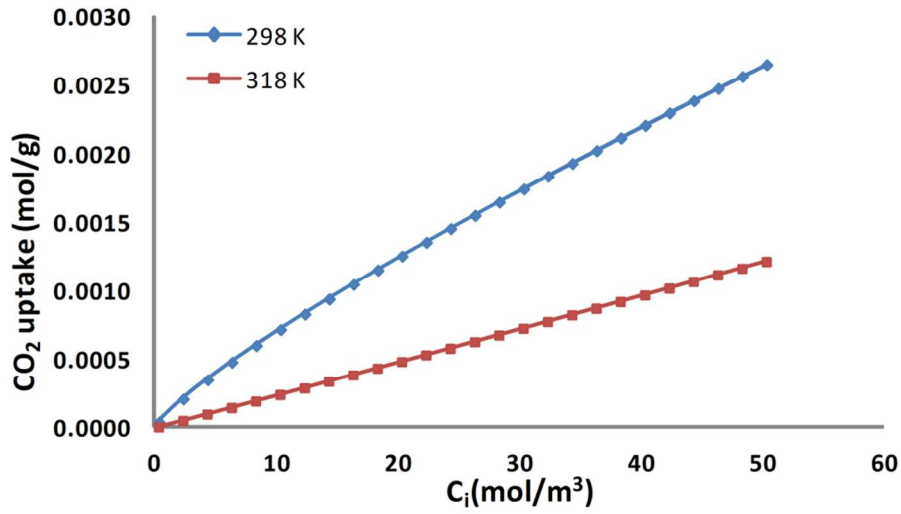

**Figure S3**

Figure S3: CO<sub>2</sub> adsorption equilibrium at different temperatures, 298 k and 318 K.

Table S1: Input parameter for the model at 298 k

| Parameters  | Values                | Unit                                          |
|-------------|-----------------------|-----------------------------------------------|
| $\square$   | 0.406                 |                                               |
| $C_o$       | 5.9                   | mol/m <sup>3</sup>                            |
| $D_L$       | $1.85 \times 10^{-5}$ | m <sup>2</sup> /s                             |
| $R_c$       | $1.25 \times 10^{-6}$ | m                                             |
| $k_t$       | $2.44 \times 10^{-5}$ | m/s                                           |
| $\square_o$ | $1.34 \times 10^{-3}$ | m/s                                           |
| $L_o$       | 0.15                  | m                                             |
| $D_c$       | $7.92 \times 10^{-2}$ | m                                             |
| $K$         | $1.1e^{-4}$           | (mol/g).(mol/m <sup>3</sup> ) <sup>-1/n</sup> |
| $n$         | 1.2                   | -                                             |

## Coefficient form of Partial differential equation (PDE) model

The general PDE equation, as well as the initial and boundary conditions with the vector variable  $u$  are as follows:

$$e_a \frac{\partial^2 y}{\partial t^2} + d_a \frac{\partial u}{\partial t} - \nabla \cdot (c \cdot \nabla u + \alpha \cdot u - \gamma) + \beta \cdot \nabla u + au = f \text{ in } \Omega$$

Boundary conditions

Dirichlet type:

$$hu = r \text{ on } \delta\Omega$$

Neumann type:

$$n \cdot (c \cdot \nabla u + \alpha \cdot u - \gamma) + au = g - h^T \mu \text{ on } \delta\Omega$$

$\Omega$  is the computational domain—the union of all domains,  $\partial\Omega$  is the domain boundary, and  $\partial\Omega$  is the domain boundary.

The coefficient in COMSOL simulation package are as follows:

The diffusion coefficient: 
$$c = \begin{pmatrix} 1/Pe & 0 \\ 0 & 0 \end{pmatrix}$$

The adsorption coefficient: 
$$a = \begin{pmatrix} 0 & 0 \\ 0 & Sh_m \end{pmatrix}$$

The mass coefficient: 
$$e_a = \begin{pmatrix} 0 & 0 \\ 0 & 0 \end{pmatrix}$$

The damping coefficient: 
$$d_a = \begin{pmatrix} 1 & D_g \\ 0 & 1 \end{pmatrix}$$

The conservative flux convection coefficient: 
$$\alpha = \begin{pmatrix} -1 & 0 \\ 0 & 0 \end{pmatrix}$$

The convection coefficient: 
$$\beta = \begin{pmatrix} 0 & 0 \\ 0 & 0 \end{pmatrix}$$

The conservative flux source: 
$$\gamma = \begin{pmatrix} 0 \\ 0 \end{pmatrix}$$

The Dirichlet coefficient as follows:

$$q = \begin{pmatrix} 0 & 0 \\ 0 & 0 \end{pmatrix}, \quad g = \begin{pmatrix} 1 \\ 0 \end{pmatrix} \quad h = \begin{pmatrix} 1 & 0 \\ 0 & 0 \end{pmatrix}, \quad r = \begin{pmatrix} 1 \\ 0 \end{pmatrix}$$

The Neumann coefficient as follows:

$$q = \begin{pmatrix} 1 & 0 \\ 0 & 0 \end{pmatrix}, \quad g = \begin{pmatrix} 10 \\ 0 \end{pmatrix}$$
